# Supplementary material for: Coronavirus disease 2019 (covid-19): a guide for UK GPs
Source: HighWire-hosted journal article supplement (doi:10.1136/bmj.m800), 2020-03-05
Supplement: razm055290.ww1.pdf [file razm055290.ww1.pdf]

This graphic is based on guidance from Public Health England and Health Protection Scotland to prepare primary care practices in the UK. It has been updated to reflect new UK government advice to the public announced on 16 March 2020

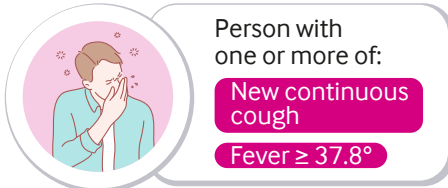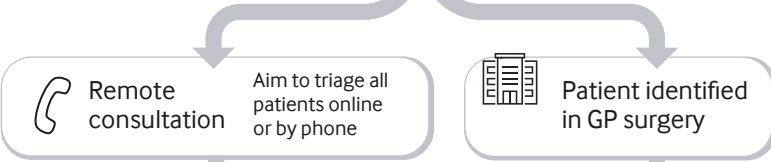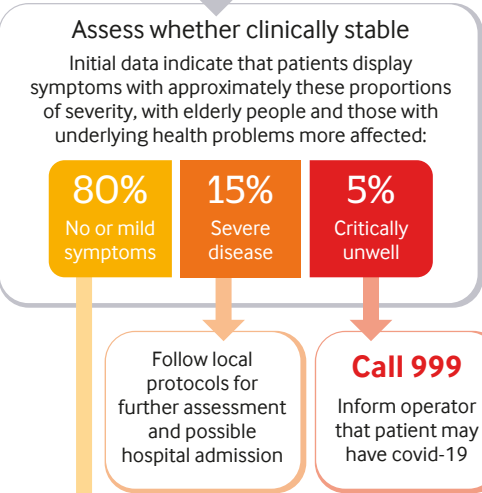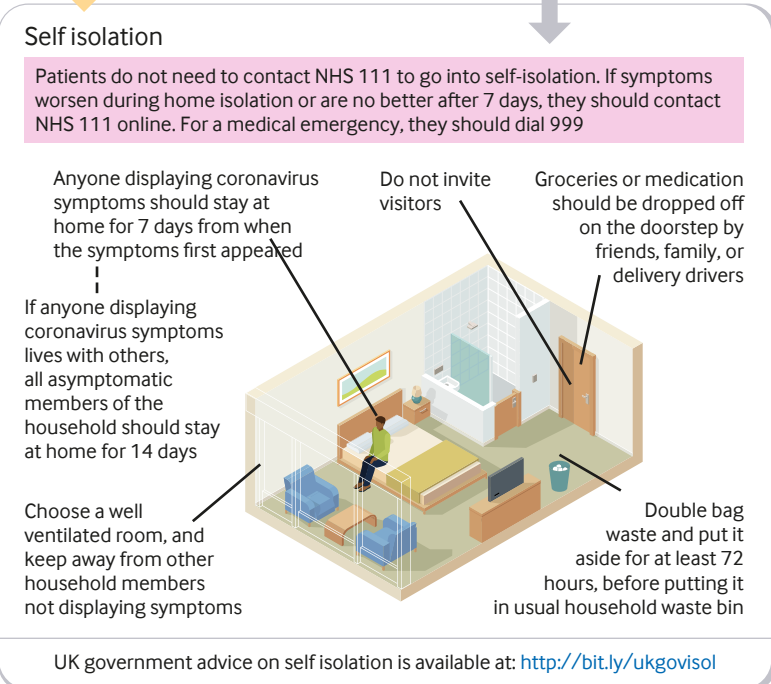

**Patients requiring hospitalisation**

Suspect covid-19 in any seriously ill patients with influenza-like illness, ARDS\*, or pneumonia

**Preparing the GP surgery in advance**

Advise patients with a cough or fever to avoid attending in person, via:

- Reception staff
- Automated phone systems
- Prominent posters
- SMS message systems
- Warning notice on online booking systems

**Isolation room**

- Located away from waiting areas and other consultation rooms
- Without carpeted floors or soft furnishing
- Close to separate toilet facility

Turn off air conditioning

Close door

Open window

Dispose of all waste in a clinical waste bag

If possible, do not enter room, reassure and update patient by telephone. If tolerated, patient to wear fluid-resistant surgical mask

Clean and disinfect hard surfaces and reusable care equipment after patient leaves. Cleaners should wear appropriate personal protective equipment

**Personal protective equipment (PPE) in primary care**

- Goggles or visor\*
- Fluid-resistant surgical mask (Type IIR)
- Gloves
- Apron

For any direct patient care (within 2 meters) or for collection of nasopharyngeal swab(s), use standard PPE

**Dispose of PPE as clinical waste after use**

\* ARDS = acute respiratory distress syndrome
